# Supplementary material for: Neuronal Cannabinoid CB1 Receptors Suppress the Growth of Melanoma Brain Metastases by Inhibiting Glutamatergic Signalling
Source: MDPI journal article supplement (doi:10.3390/cancers15092439), 2023-04-24

Figure 5B, Glu-CB<sub>1</sub>R (WT and KO)

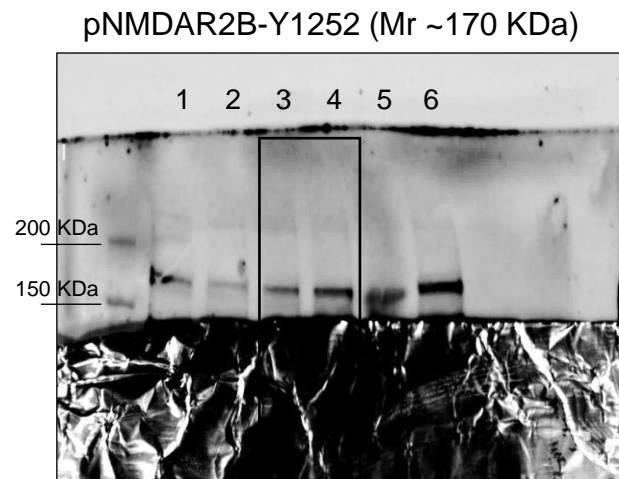

Resizing

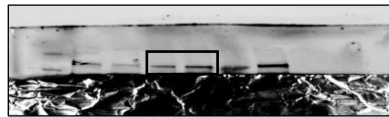

An aluminium foil was placed to allow a longer exposure of the specific band (see right)

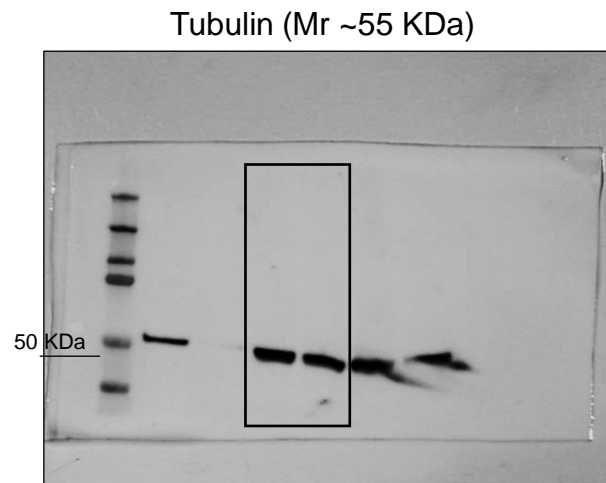

Resizing

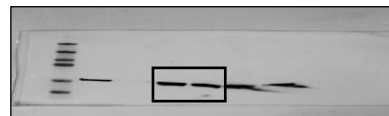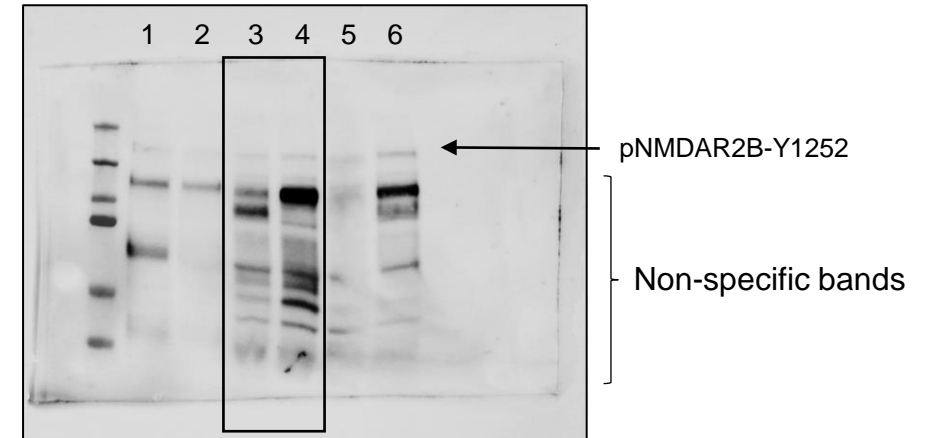

Shorter exposure without aluminium foil

Key to blot lanes

1. Unrelated sample
2. Unrelated sample
3. Glu-CB<sub>1</sub>R WT tumour
4. Glu-CB<sub>1</sub>R KO tumour
5. Glu-CB<sub>1</sub>R WT tumour
6. Glu-CB<sub>1</sub>R KO tumour

Figure 5B, GABA- $\text{CB}_1\text{R}$  (WT and KO)

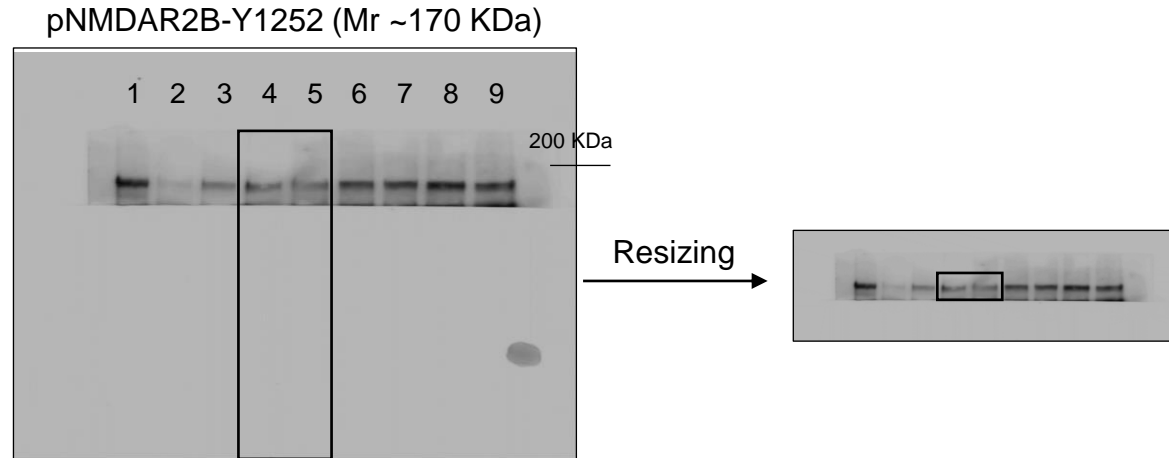

The membrane was cut to allow the simultaneous detection of tubulin

Key to blot lanes

1. Unrelated sample
2. Unrelated sample
3. Unrelated sample
4. GABA- $\text{CB}_1\text{R}$  WT tumour
5. GABA- $\text{CB}_1\text{R}$  KO tumour
6. GABA- $\text{CB}_1\text{R}$  WT tumour
7. GABA- $\text{CB}_1\text{R}$  KO tumour
8. GABA- $\text{CB}_1\text{R}$  WT tumour
9. GABA- $\text{CB}_1\text{R}$  KO tumour

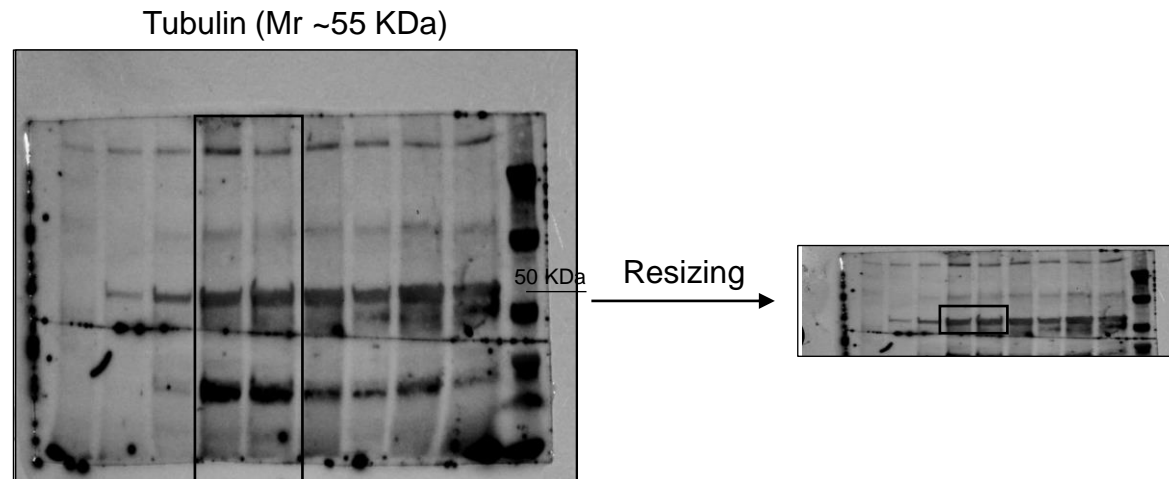

Supplement: s1 [file s1]
